# Supplementary material for: Nasal Cannula with Long and Narrow Tubing for Non-Invasive Respiratory Support in Preterm Neonates: A Systematic Review and Meta-Analysis
Source: MDPI journal article supplement (doi:10.3390/children9101461), 2022-09-23
Supplement: s1 [file s1]

# **Nasal cannula with long & narrow tubing versus other nasal interfaces for non-invasive respiratory support in preterm neonates: A systematic review and meta-analysis**

Table S1: Literature search strategy

Table S2: Statements to communicate the findings of the systematic review

Table S3: Excluded studies

Table S4: Risk of Bias for randomised controlled trials

Table S5: Risk of Bias for non-randomised controlled trials

**Table S1: Literature search strategy**

Database: Cochrane Library. Search Name: Cannula-ventilation, Date

Run:17/01/2021 00:26:44

Search updated on 07-07-2022. Year limited 2021-2022 and 82 new trials

downloaded for review update

| ID  | Search                                                              | Hits  |
|-----|---------------------------------------------------------------------|-------|
| #1  | MeSH descriptor: [Infant, Premature] explode all trees              | 3785  |
| #2  | MeSH descriptor: [Infant, Low Birth Weight] explode all trees       | 2191  |
| #3  | (Preterm* or premature or "Low birth weight" or lbw or vlbw or elbw | 30409 |
| #4  | #1 or #3                                                            | 30409 |
| #5  | cannula*                                                            | 5888  |
| #6  | tube OR tubing                                                      | 17781 |
| #7  | CLNT                                                                | 1     |
| #8  | mask                                                                | 10646 |
| #9  | prong*                                                              | 563   |
| #10 | interface                                                           | 4680  |
| #11 | canula                                                              | 157   |
| #12 | RAM NEAR (cannula* or tube*)                                        | 21    |
| #13 | MeSH descriptor: [Cannula] explode all trees                        | 97    |
| #14 | MeSH descriptor: [Masks] explode all trees                          | 1557  |
| #15 | {OR #5-#14}                                                         | 36356 |
| #16 | MeSH descriptor: [Intermittent Positive-Pressure Ventilation]       | 247   |
| #17 | MeSH descriptor: [Noninvasive Ventilation] explode all trees        | 257   |
| #18 | Continuous Positive Airway Pressure                                 | 4542  |
| #19 | NIPPV                                                               | 359   |
| #20 | intermittent positive-pressure ventilation                          | 758   |
| #21 | noninvasive ventilation                                             | 3688  |
| #22 | MeSH descriptor: [Continuous Positive Airway Pressure] explode all  | 1095  |
| #23 | cpap                                                                | 4864  |
| #24 | ventilation                                                         | 27745 |
| #25 | {OR #16-#24}                                                        | 31846 |
| #26 | #4 AND #15 AND #25                                                  | 833   |

Database(s): **Ovid MEDLINE(R) ALL** 1946 to January 14, 2021

Search Strategy:

| # | Searches                           | Results |
|---|------------------------------------|---------|
| 1 | Infant, Premature/                 | 54667   |
| 2 | Infant, Small for Gestational Age/ | 7575    |
| 3 | Infant, Low Birth Weight/          | 18744   |
| 4 | Infant, Extremely Premature/       | 2703    |
| 5 | Infant, Very Low Birth Weight/     | 8649    |

|    |                                                                                                                                                                                                                                                                                                                        |        |
|----|------------------------------------------------------------------------------------------------------------------------------------------------------------------------------------------------------------------------------------------------------------------------------------------------------------------------|--------|
| 6  | (Preterm* or premature or "Low birth weight" or lbw or vlbw or "Low birth weights" or "Low birthweight" or "Low birthweights" or "pre-terms" or "Pre-term" or "Small gestational age" or SGA or "Extremely premature").ab,ti.                                                                                          | 215606 |
| 7  | 1 or 2 or 3 or 4 or 5 or 6                                                                                                                                                                                                                                                                                             | 236461 |
| 8  | Tube.mp.                                                                                                                                                                                                                                                                                                               | 162040 |
| 9  | CInt.mp.                                                                                                                                                                                                                                                                                                               | 7      |
| 10 | Mask.mp. or Masks/                                                                                                                                                                                                                                                                                                     | 33922  |
| 11 | canula*.mp.                                                                                                                                                                                                                                                                                                            | 709    |
| 12 | cannula*.mp. [mp=title, abstract, original title, name of substance word, subject heading word, floating sub-heading word, keyword heading word, organism supplementary concept word, protocol supplementary concept word, rare disease supplementary concept word, unique identifier, synonyms]                       | 45825  |
| 13 | (ram adj3 (cannula* or tube*)).mp. [mp=title, abstract, original title, name of substance word, subject heading word, floating sub-heading word, keyword heading word, organism supplementary concept word, protocol supplementary concept word, rare disease supplementary concept word, unique identifier, synonyms] | 28     |
| 14 | tubing.mp.                                                                                                                                                                                                                                                                                                             | 7464   |
| 15 | prong*.mp.                                                                                                                                                                                                                                                                                                             | 3628   |
| 16 | 8 or 9 or 10 or 11 or 12 or 13 or 14 or 15                                                                                                                                                                                                                                                                             | 248091 |
| 17 | intermittent positive pressure ventilation.mp. or Intermittent Positive-Pressure Ventilation/                                                                                                                                                                                                                          | 3040   |
| 18 | Noninvasive Ventilation/ or Continuous Positive Airway Pressure/ or NIPPV.mp.                                                                                                                                                                                                                                          | 10045  |
| 19 | "continuous positive airway pressure".mp.                                                                                                                                                                                                                                                                              | 13013  |
| 20 | Continuous Positive Airway Pressure/ or cpap.mp.                                                                                                                                                                                                                                                                       | 12275  |
| 21 | ventilation.mp. or Ventilation/                                                                                                                                                                                                                                                                                        | 143094 |
| 22 | 17 or 18 or 19 or 20 or 21                                                                                                                                                                                                                                                                                             | 153940 |
| 23 | 7 and 16 and 22                                                                                                                                                                                                                                                                                                        | 1050   |
| 24 | limit 23 to clinical trial, all                                                                                                                                                                                                                                                                                        | 171    |

Database(s): **Embase** 1974 to 2021 Week 01

Search Strategy:

| # | Searches                           | Results |
|---|------------------------------------|---------|
| 1 | Infant, Premature/                 | 101009  |
| 2 | Infant, Small for Gestational Age/ | 15111   |
| 3 | Infant, Low Birth Weight/          | 33240   |
| 4 | Infant, Extremely Premature/       | 106004  |

|    |                                                                                                                                                                                                                               |        |
|----|-------------------------------------------------------------------------------------------------------------------------------------------------------------------------------------------------------------------------------|--------|
| 5  | Infant, Very Low Birth Weight/                                                                                                                                                                                                | 12669  |
| 6  | (Preterm* or premature or "Low birth weight" or lbw or vlbw or "Low birth weights" or "Low birthweight" or "Low birthweights" or "pre-terms" or "Pre-term" or "Small gestational age" or SGA or "Extremely premature").ab,ti. | 286816 |
| 7  | 1 or 2 or 3 or 4 or 5 or 6                                                                                                                                                                                                    | 324334 |
| 8  | Tube.mp.                                                                                                                                                                                                                      | 273799 |
| 9  | CInt.mp.                                                                                                                                                                                                                      | 10     |
| 10 | Mask.mp. or Masks/                                                                                                                                                                                                            | 66259  |
| 11 | canula*.mp.                                                                                                                                                                                                                   | 1418   |
| 12 | cannula*.mp. [mp=title, abstract, heading word, drug trade name, original title, device manufacturer, drug manufacturer, device trade name, keyword, floating subheading word, candidate term word]                           | 75214  |
| 13 | (ram adj3 (cannula* or tube*)).mp. [mp=title, abstract, heading word, drug trade name, original title, device manufacturer, drug manufacturer, device trade name, keyword, floating subheading word, candidate term word]     | 56     |
| 14 | tubing.mp.                                                                                                                                                                                                                    | 10335  |
| 15 | prong*.mp.                                                                                                                                                                                                                    | 5220   |
| 16 | 8 or 9 or 10 or 11 or 12 or 13 or 14 or 15                                                                                                                                                                                    | 417105 |
| 17 | intermittent positive pressure ventilation.mp. or Intermittent Positive-Pressure Ventilation/                                                                                                                                 | 4144   |
| 18 | Noninvasive Ventilation/ or Continuous Positive Airway Pressure/ or NIPPV.mp.                                                                                                                                                 | 58808  |
| 19 | "continuous positive airway pressure".mp.                                                                                                                                                                                     | 15359  |
| 20 | Continuous Positive Airway Pressure/ or cpap.mp.                                                                                                                                                                              | 53996  |
| 21 | ventilation.mp. or Ventilation/                                                                                                                                                                                               | 283057 |
| 22 | 17 or 18 or 19 or 20 or 21                                                                                                                                                                                                    | 311901 |
| 23 | 7 and 16 and 22                                                                                                                                                                                                               | 2430   |
| 24 | limit 23 to embase                                                                                                                                                                                                            | 1701   |
| 25 | limit 24 to clinical trial                                                                                                                                                                                                    | 102    |

#### CINAHL: EBSCOhost Research Databases Search Screen - Advanced Search

Monday, January 18, 2021 12:01:15 PM

| Search # | Searches                                                                                                                                        | Results |
|----------|-------------------------------------------------------------------------------------------------------------------------------------------------|---------|
| S15      | S3 AND S8 AND S13                                                                                                                               | 468     |
| S14      | S3 AND S8 AND S13                                                                                                                               | 1,706   |
| S13      | S9 OR S10 OR S11 OR S12                                                                                                                         | 42,779  |
| S12      | TI ( ventilation OR cpap or continuous positive airway pressure or ncpap or nasal continuous positive airway pressure OR NIPPV OR NIV ) OR AB ( | 38,392  |

|     |                                                                                                                                                                                                                                                                                                                                                                                                                                                                                                                                                                      |         |
|-----|----------------------------------------------------------------------------------------------------------------------------------------------------------------------------------------------------------------------------------------------------------------------------------------------------------------------------------------------------------------------------------------------------------------------------------------------------------------------------------------------------------------------------------------------------------------------|---------|
|     | ventilation OR cpap or continuous positive airway pressure or ncpap or nasal continuous positive airway pressure OR NIPPV OR NIV )                                                                                                                                                                                                                                                                                                                                                                                                                                   |         |
| S11 | (MH "Continuous Positive Airway Pressure") OR "Continuous Positive Airway Pressure"                                                                                                                                                                                                                                                                                                                                                                                                                                                                                  | 6,680   |
| S10 | "Noninvasive Ventilation"                                                                                                                                                                                                                                                                                                                                                                                                                                                                                                                                            | 1,682   |
| S9  | (MH "Intermittent Positive Pressure Ventilation") OR (MH "Positive Pressure Ventilation+") OR (MH "Pressure Support Ventilation") OR (MH "Intermittent Positive Pressure Breathing") OR (MH "Continuous Positive Airway Pressure") OR "Intermittent Positive-Pressure Ventilation"                                                                                                                                                                                                                                                                                   | 11,539  |
| S8  | S4 OR S5 OR S6 OR S7                                                                                                                                                                                                                                                                                                                                                                                                                                                                                                                                                 | 66,657  |
| S7  | TI ( Cannula* OR canula* OR tube OR tubing OR CLNT OR mask* OR prong* OR interface ) OR AB ( Cannula* OR canula* OR tube OR tubing OR CLNT OR mask* OR prong* OR interface )                                                                                                                                                                                                                                                                                                                                                                                         | 65,383  |
| S6  | RAM N (cannula OR tube OR canula)                                                                                                                                                                                                                                                                                                                                                                                                                                                                                                                                    | 3       |
| S5  | (MH "Masks")                                                                                                                                                                                                                                                                                                                                                                                                                                                                                                                                                         | 2,792   |
| S4  | (MH "Nasal Cannula")                                                                                                                                                                                                                                                                                                                                                                                                                                                                                                                                                 | 558     |
| S3  | S1 OR S2                                                                                                                                                                                                                                                                                                                                                                                                                                                                                                                                                             | 674,257 |
| S2  | TI ( (Neonate* or Newborn* or Preterm* or term or premature or "Low birth weight" or lbw or vlbw or elbw or "Low birth weights" or "Low birthweight" or "Low birthweights" or Infant* or "pre-terms" or "Pre-term" or "Small gestational age" or SGA or "Extremely premature") ) OR AB ( (Neonate* or Newborn* or Preterm* or term or premature or "Low birth weight" or lbw or vlbw or elbw or "Low birth weights" or "Low birthweight" or "Low birthweights" or Infant* or "pre-terms" or "Pre-term" or "Small gestational age" or SGA or "Extremely premature") ) | 510,328 |
| S1  | (MH "Infant+") OR (MH "Infant, Premature") OR (MH "Infant, Postmature") OR (MH "Infant, High Risk") OR (MH "Infant, Very Low Birth Weight") OR (MH "Infant, Small for Gestational Age") OR (MH "Infant, Large for Gestational Age") OR (MH "Infant, Newborn, Diseases+")                                                                                                                                                                                                                                                                                             | 275,252 |

**Table S2: Statements to communicate the findings of the systematic review**

| Descriptor                                                                                                                                                                                                                                                                                                                                                                                        | Criteria                                                                                                                                                                                                                                                                                                                                                                                                                                   |
|---------------------------------------------------------------------------------------------------------------------------------------------------------------------------------------------------------------------------------------------------------------------------------------------------------------------------------------------------------------------------------------------------|--------------------------------------------------------------------------------------------------------------------------------------------------------------------------------------------------------------------------------------------------------------------------------------------------------------------------------------------------------------------------------------------------------------------------------------------|
| Clinical benefit/harm                                                                                                                                                                                                                                                                                                                                                                             | <p>Statistically significant result</p> <p>High certainty evidence</p> <p>Biological mechanism(s) well established</p> <p>Point estimates of underlying studies are consistently in one direction</p> <p>Optimal information size reached<sup>6</sup></p>                                                                                                                                                                                  |
| Probable clinical benefit/harm                                                                                                                                                                                                                                                                                                                                                                    | <p>Statistically significant result</p> <p>Moderate or high certainty evidence</p> <p>Evidence of biological plausibility</p> <p>Point estimates of underlying studies are predominately in one direction</p> <p>Close to optimal information size or summary confidence interval is sufficiently narrow to give confidence that the true effect would be clinically meaningful if it is only in the ballpark of the summary estimate.</p> |
| Possible clinical benefit/harm                                                                                                                                                                                                                                                                                                                                                                    | <p>Statistically significant result</p> <p>Low or very low certainty evidence</p> <p>Few studies, wide summary confidence interval or effect is driven by one or two heavily weighted studies</p>                                                                                                                                                                                                                                          |
| Improbable benefit/harm                                                                                                                                                                                                                                                                                                                                                                           | <p>Statistically non-significant result</p> <p>Moderate or high certainty evidence</p> <p>Point estimates of underlying studies are close to and on both sides of the line of null effect</p>                                                                                                                                                                                                                                              |
| No clinical benefit/harm                                                                                                                                                                                                                                                                                                                                                                          | <p>Statistically non-significant result</p> <p>High certainty evidence</p> <p>Point estimates of underlying studies are close to and on either side of the line of null effect</p> <p>Majority of underlying studies are adequately powered for outcome of interest</p> <p>Optimal information size reached reached</p>                                                                                                                    |
| Clinical benefit/harm cannot be excluded                                                                                                                                                                                                                                                                                                                                                          | <p>Statistically non-significant result</p> <p>Low or very low certainty evidence</p> <p>Few studies</p> <p>Wide confidence intervals</p>                                                                                                                                                                                                                                                                                                  |
| <p>Modified GRADE recommendations (Ref: Santesso N, Glenton C, Dahm P, Garner P, Akl EA, Alper B, Brignardello-Petersen R, Carrasco-Labra A, De Beer H, Hultcrantz M, Kuijpers T, Meerpohl J, Morgan R, et al., GRADE Working Group. GRADE guidelines 26: informative statements to communicate the findings of systematic reviews of interventions. J Clin Epidemiol. 2020 Mar;119:126-135.)</p> |                                                                                                                                                                                                                                                                                                                                                                                                                                            |

**Table S3: Excluded studies**

| <b>Study</b>                                      | <b>Reason for exclusion</b>                                                                                                                                                                                                                   |
|---------------------------------------------------|-----------------------------------------------------------------------------------------------------------------------------------------------------------------------------------------------------------------------------------------------|
| <i>Green et al (2018)</i> <sup>17</sup>           | Compared the resistance of interfaces used to CPAP delivery in neonates, in an in vitro setting.                                                                                                                                              |
| <i>Gerdes et al ((2014)</i> <sup>19</sup>         | Studied the factors influencing delivered mean airway pressure during nasal CPAP with RAM cannula on a simulated test lung model.                                                                                                             |
| <i>Iyer et al (2015)</i> <sup>21</sup>            | Measured the transmission of pressures using RAM cannula in an ex vivo experimental design on lung simulator                                                                                                                                  |
| <i>Bailes et al (2016)</i> <sup>4</sup>           | Evaluated the effect of flow and interface type on pressures delivered with Bubble CPAP in a simulated lung model.                                                                                                                            |
| <i>Classen et al (2019)</i> <sup>36</sup>         | Compared two Bubble CPAP devices Babi-plus and B&B Bubbler using RAM cannula for pressure transmission in Bench studies. In the clinical outcomes, the comparators were the two Bubble CPAP devices.                                          |
| <i>Matlock et al (2019)</i> <sup>16</sup>         | The outcome was tidal volume delivered during NIPPV, which was not of interest for this meta-analysis                                                                                                                                         |
| <i>Chandrasekharan et al (2017)</i> <sup>37</sup> | Compared the efficacy and safety of continuous positive airway pressure (CPAP) delivered using nasal masks with binasal prongs. The comparator groups did not use RAM cannula as interface and hence were not relevant to this review.        |
| <i>Luistero et al (2020)</i> <sup>38</sup>        | Conducted a randomised controlled trial, determined the effectiveness of KMC in neonates on CPAP with RAM cannula. Both the groups received the CPAP through RAM cannula and outcomes were analysed to determine effect of KMC versus no KMC. |
| <i>Conti et al (2018)</i> <sup>39</sup>           | Compared new nasal mask, Fischer Paykel nasal mask and endotracheal tube on infant manikin.                                                                                                                                                   |

**Table S4: Risk of Bias for randomised controlled trials**

| Study ID       | Domain 1. Risk of bias from the randomization process | Domain 2. Risk of bias due to deviations from the intended interventions | Domain 3. Missing outcome data | Domain 4. Risk of bias in measurement of the outcome | Domain 5. Risk of bias in selection of the reported result | Overall Risk of Bias judgement |
|----------------|-------------------------------------------------------|--------------------------------------------------------------------------|--------------------------------|------------------------------------------------------|------------------------------------------------------------|--------------------------------|
| Gocke 2019     | Some concerns                                         | Low                                                                      | Low                            | Low                                                  | Low                                                        | Some concerns                  |
| Hoschwald 2021 | Low                                                   | Low                                                                      | Low                            | Low                                                  | Low                                                        | Low                            |
| Maram 2019     | Low                                                   | Low                                                                      | Low                            | Low                                                  | Low                                                        | Low                            |

**Table S5: Risk of Bias for non-randomised controlled trials**

| Study ID      | Bias due to confounding | Bias in selecting participants | Bias in classification of the interventions | Bias due to deviations from intended interventions | Bias due to missing data | Bias in measurement of outcomes | Bias in selection of the reported result | Overall risk of bias |
|---------------|-------------------------|--------------------------------|---------------------------------------------|----------------------------------------------------|--------------------------|---------------------------------|------------------------------------------|----------------------|
| Sharma 2020   | Serious                 | Low                            | Low                                         | Low                                                | Low                      | Moderate                        | Low                                      | Serious              |
| Singh 2018    | Low                     | Low                            | Low                                         | Low                                                | Low                      | Moderate                        | Low                                      | Moderate             |
| Drescher 2018 | Serious                 | Serious                        | Moderate                                    | Low                                                | Low                      | Moderate                        | Moderate                                 | Serious              |
